# Supplementary material for: A Ru(ii)-arene-ferrocene complex with promising antibacterial activity
Source: Royal Society of Chemistry journal article supplement (doi:10.1039/d2dt02696a), 2022-01-01
Supplement: d2dt02696a1.pdf [file d2dt02696a1.pdf]

## Electronic Supplementary Information

### A Ru(II)-Arene-Ferrocene Complex With Promising Antibacterial Activity

Stephen Mensah,<sup>a</sup> Joseph D. Rosenthal,<sup>a</sup> Mamta Dagar,<sup>c</sup> Tyson Brown,<sup>a</sup> Jonathan J. Mills,<sup>a</sup>  
Christopher G. Hamaker,<sup>a</sup> Gregory M. Ferrence,<sup>a</sup> Michael I. Webb<sup>a,b\*</sup>

<sup>a</sup> Department of Chemistry, Illinois State University, Normal, IL, 61790

<sup>b</sup> Department of Chemistry, SUNY Geneseo, Geneseo, NY, 14454

<sup>c</sup> Department of Chemistry, University of Rochester, Rochester, NY, 14627

Corresponding Author: Michael I. Webb, [mwebb@geneseo.edu](mailto:mwebb@geneseo.edu)

#### Table of Contents:

- **Figures S1-S3:** <sup>1</sup>H NMR spectra for the prepared Ru(II) complexes.
- **Figures S4-S6:** <sup>13</sup>C NMR spectra for the prepared Ru(II) complexes.
- **Figures S7-S9:** Cyclic voltammograms for the prepared Ru(II) complexes.
- **Figures S10-S12:** UV-Vis spectra for the prepared Ru(II) complexes.
- **Figures S13-S16:** <sup>1</sup>H NMR spectra for the prepared complexes in D<sub>2</sub>O and D<sub>6</sub>-DMSO following prolonged incubation at 37°C.
- **Figures S17-S19:** Fluorescence emission spectra at various complex-to-HSA ratios.
- **Figures S20-S22:** UV-Vis spectra for the prepared Ru(II) complexes with HSA.
- **Figures S23-S25:** UV-Vis spectra for the prepared Ru(II) complexes with CT-DNA.
- **Figures S26-S29:** UV-Vis spectra for the titration of the prepared Ru(II) complexes with CT-DNA and plots of [DNA] / (ε<sub>A</sub> - ε<sub>F</sub>) versus [DNA].
- **Figures S30-S32:** Calibration curves for each complex to determine the extinction coefficients for each free complex.
- **Table S1.** Crystallographic data for complexes **C1** and **C3**.

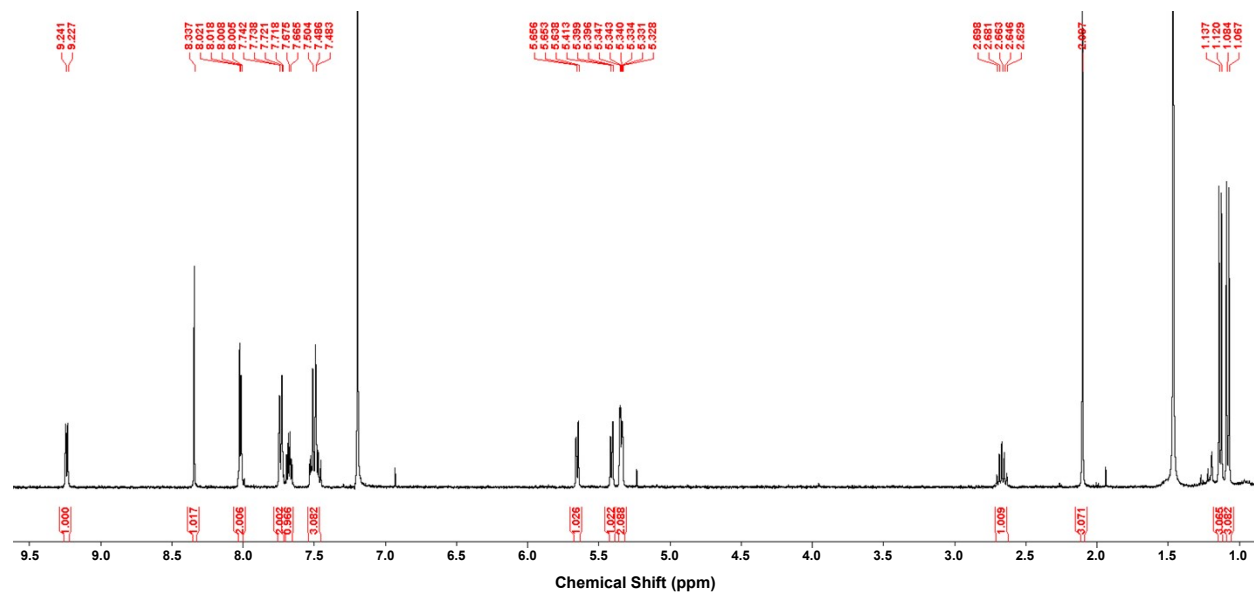

Figure S1.  $^1\text{H}$  NMR of **C1** in  $\text{CDCl}_3$ .

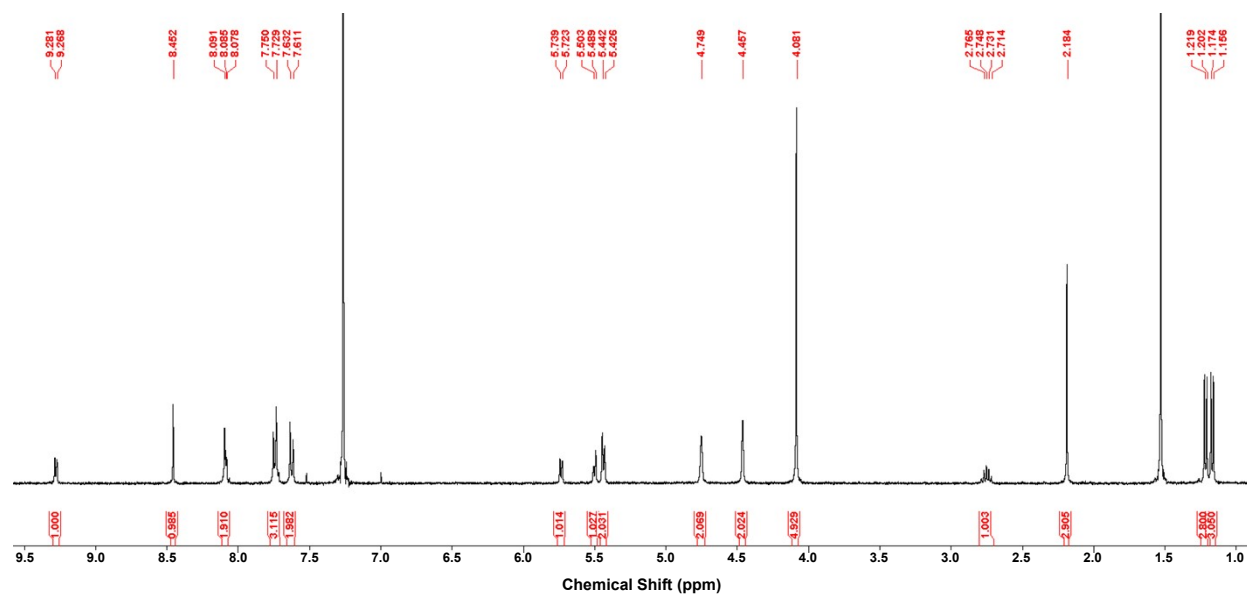

Figure S2.  $^1\text{H}$  NMR of **C2** in  $\text{CDCl}_3$ .

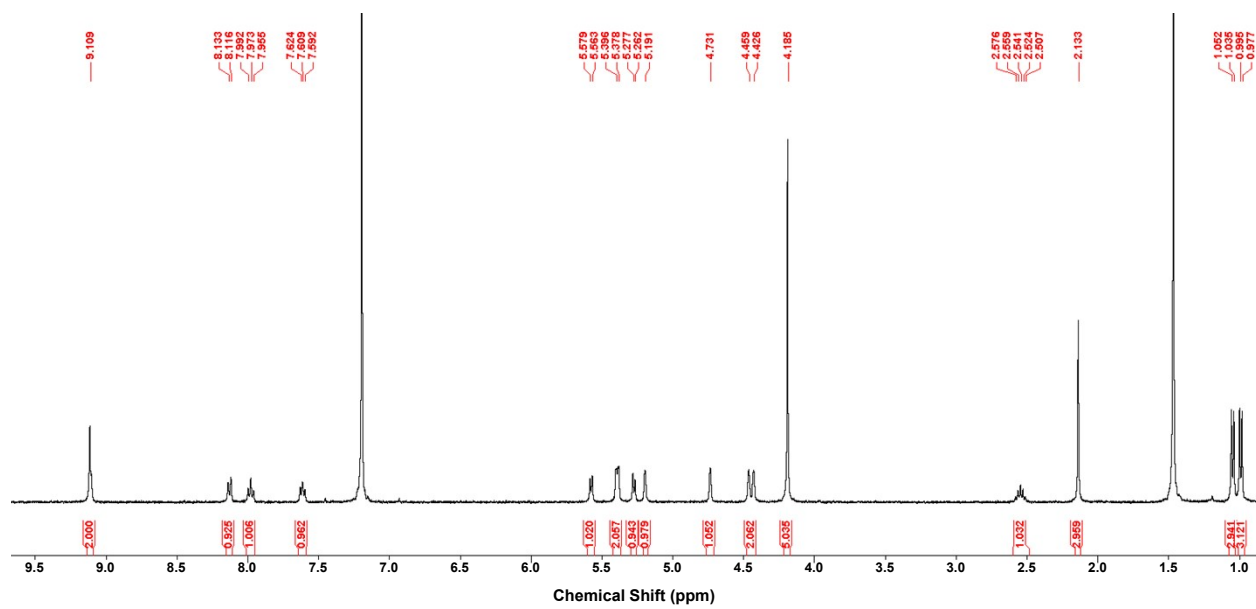

Figure S3.  $^1\text{H}$  NMR of **C3** in  $\text{CDCl}_3$ .

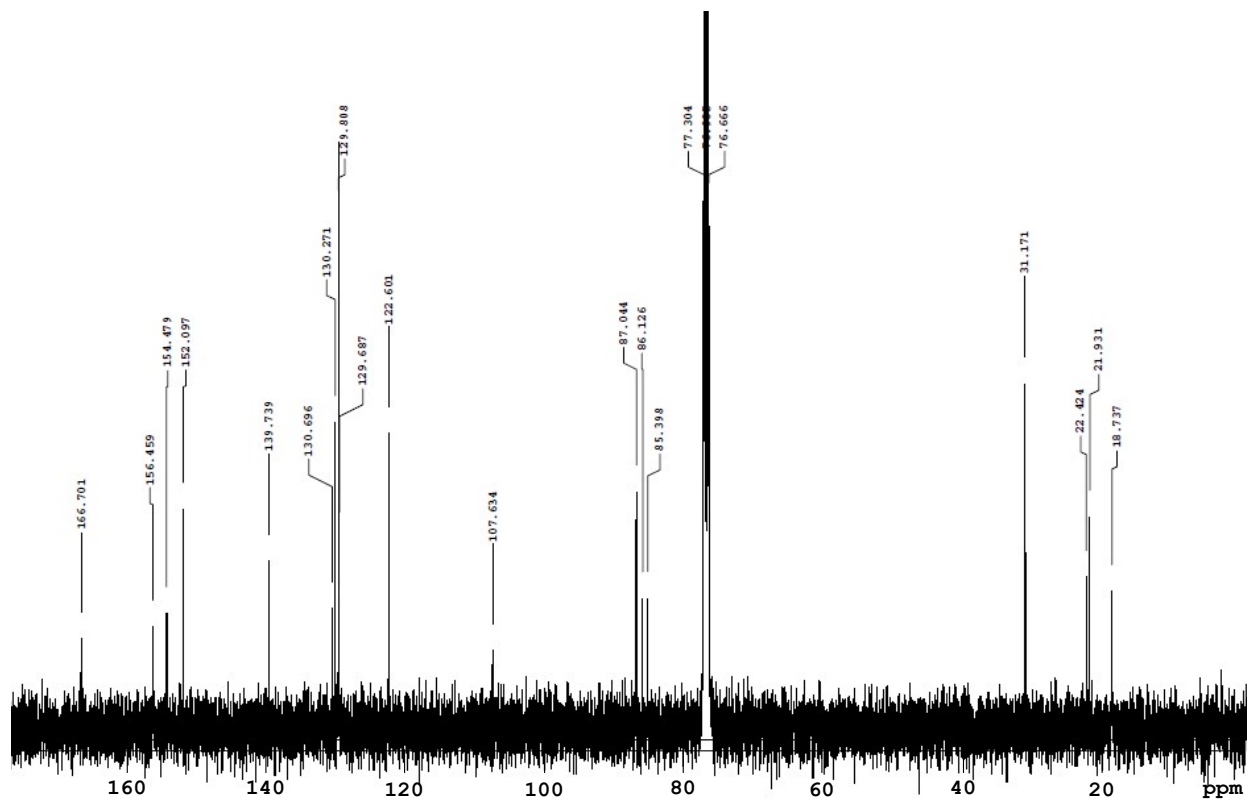

**Figure S4.**  $^{13}\text{C}$  NMR of C1 in  $\text{CDCl}_3$ .

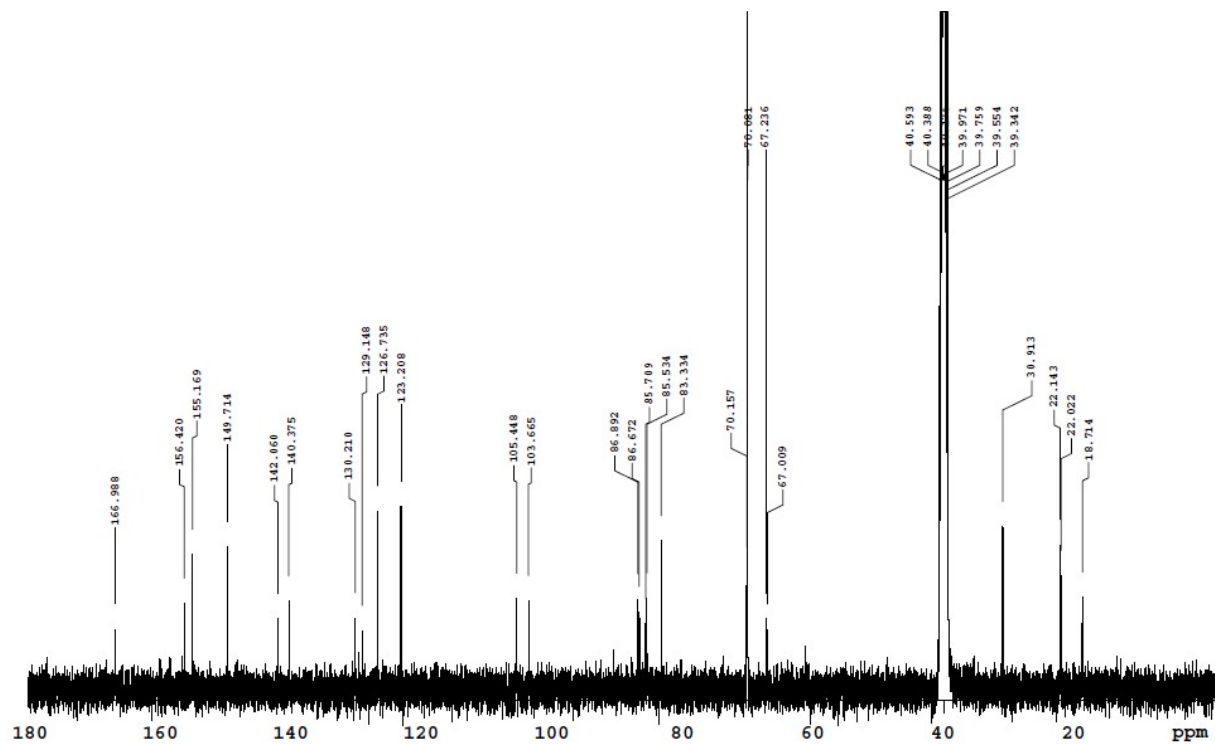

**Figure S5.** <sup>13</sup>C NMR of C2 in D<sub>6</sub>-DMSO.

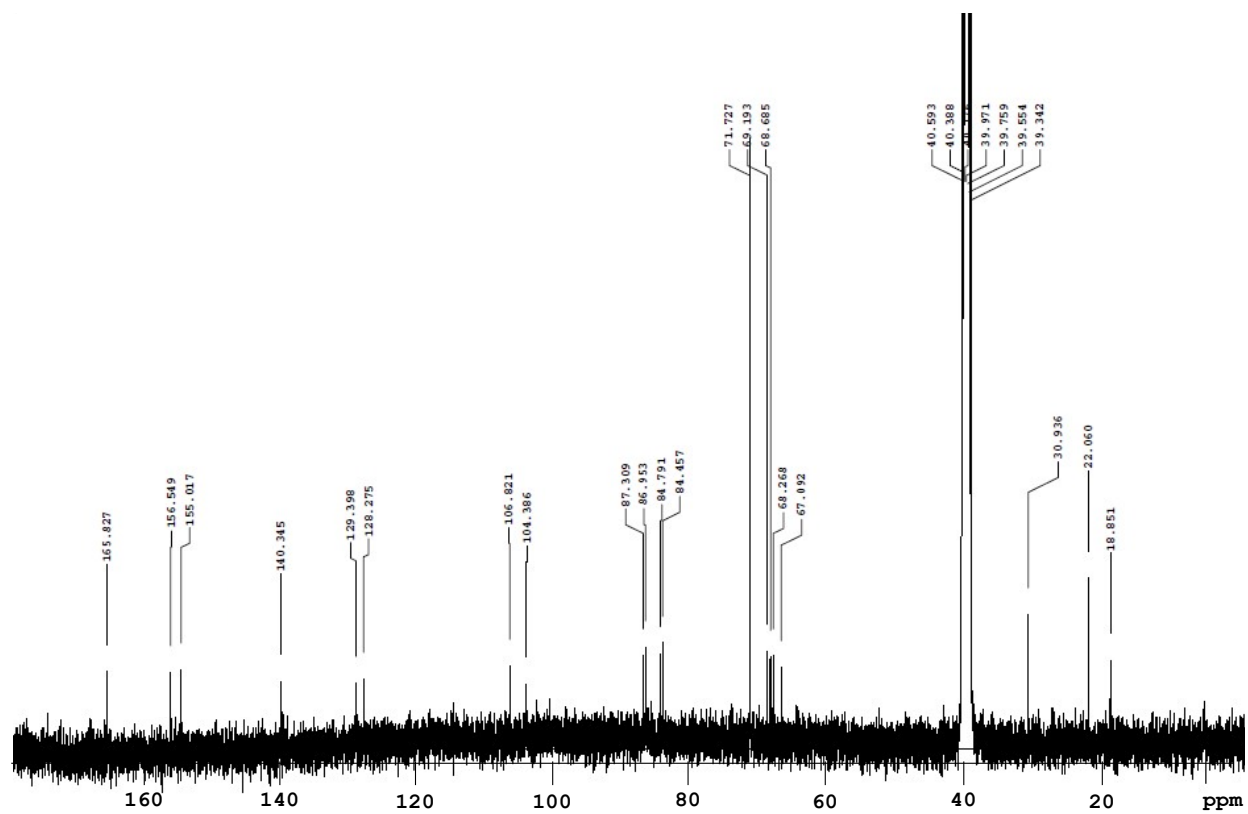

Figure S6.  $^{13}\text{C}$  NMR of C3 in  $\text{D}_6\text{-DMSO}$ .

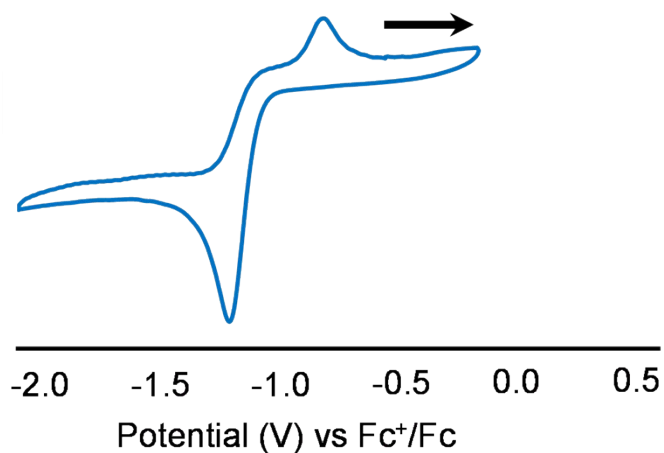

**Figure S7.** Cyclic voltammogram of **C1** (1 mM) in CH<sub>2</sub>Cl<sub>2</sub> containing 0.1 M [NBu<sub>4</sub>][PF<sub>6</sub>], where the scan direction is indicated by the arrow. An irreversible redox couple was observed with reduction potentials of -0.80 V and -1.23 V.

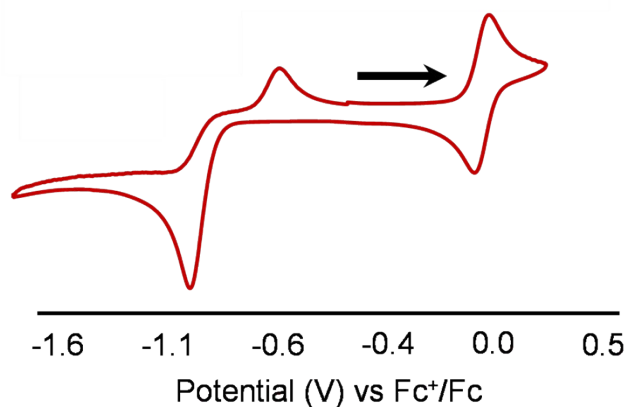

**Figure S8.** Cyclic voltammogram of **C2** (1 mM) in CH<sub>2</sub>Cl<sub>2</sub> containing 0.1 M [NBu<sub>4</sub>][PF<sub>6</sub>], where the scan direction is indicated by the arrow.

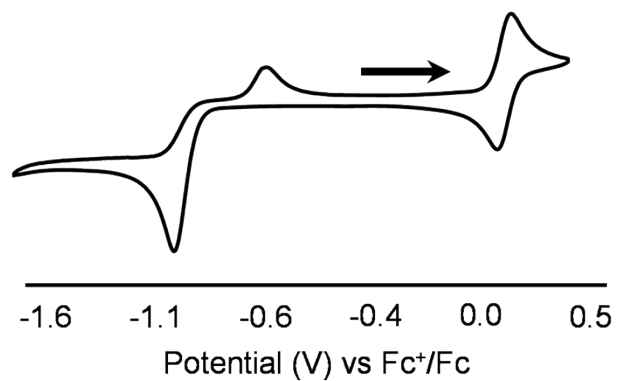

**Figure S9.** Cyclic voltammogram of **C3** (1 mM) in CH<sub>2</sub>Cl<sub>2</sub> containing 0.1 M [NBu<sub>4</sub>][PF<sub>6</sub>], where the scan direction is indicated by the arrow.



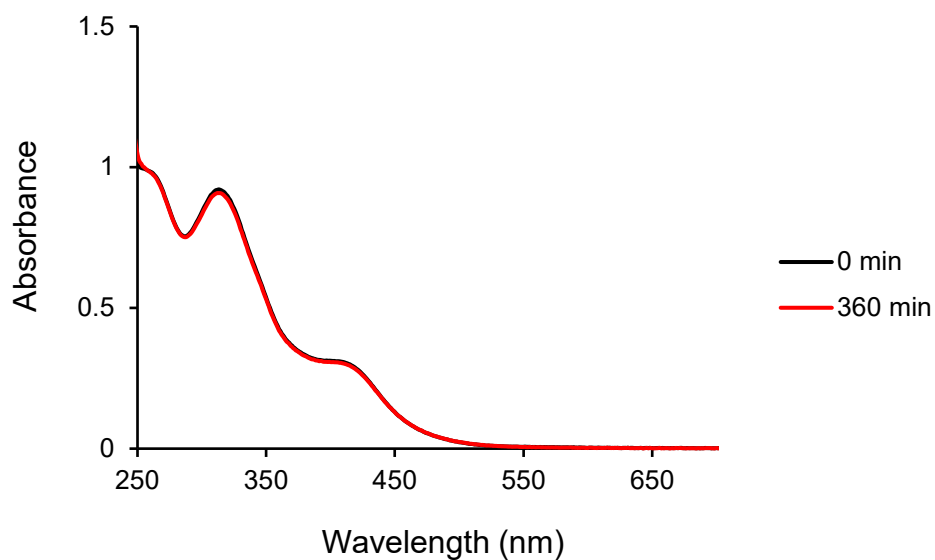

**Figure S10.** UV-Vis spectra of complex **C1** (100  $\mu$ M) incubated in PBS (pH 7.4) at 37  $^{\circ}$ C for 6 hours.

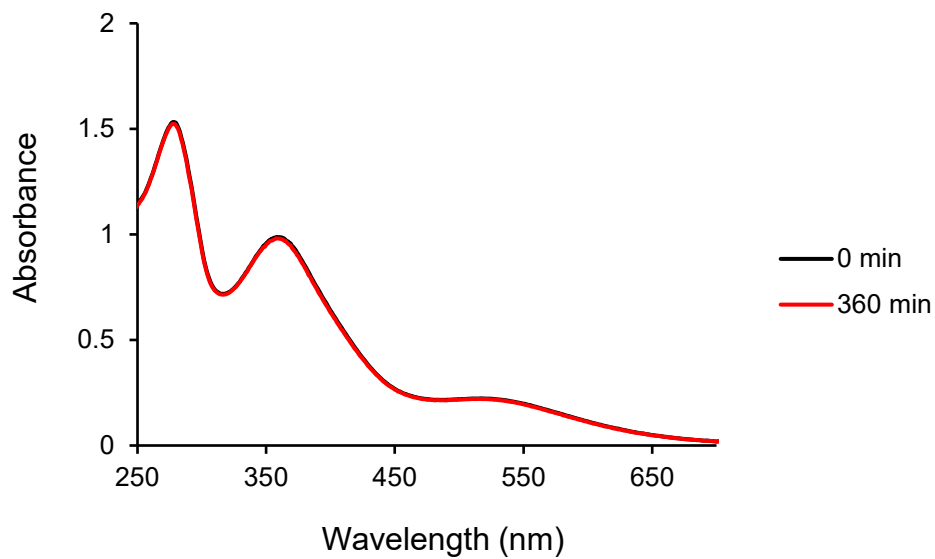

**Figure S11.** UV-Vis spectra of complex **C2** (100  $\mu$ M) incubated in PBS (pH 7.4) at 37  $^{\circ}$ C for 6 hours.

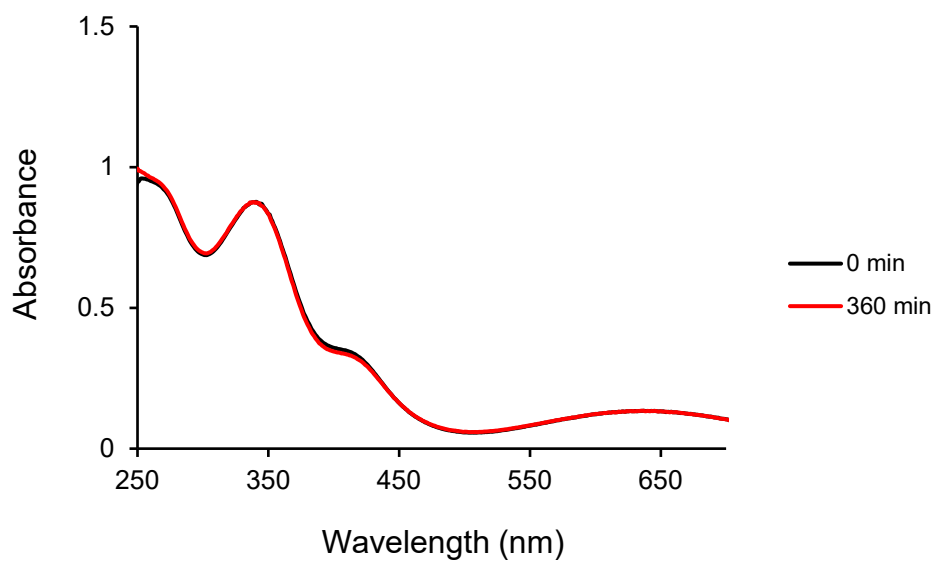

**Figure S12.** UV-Vis spectra of complex **C3** (100  $\mu$ M) incubated in PBS (pH 7.4) at 37  $^{\circ}$ C for 6 hours.

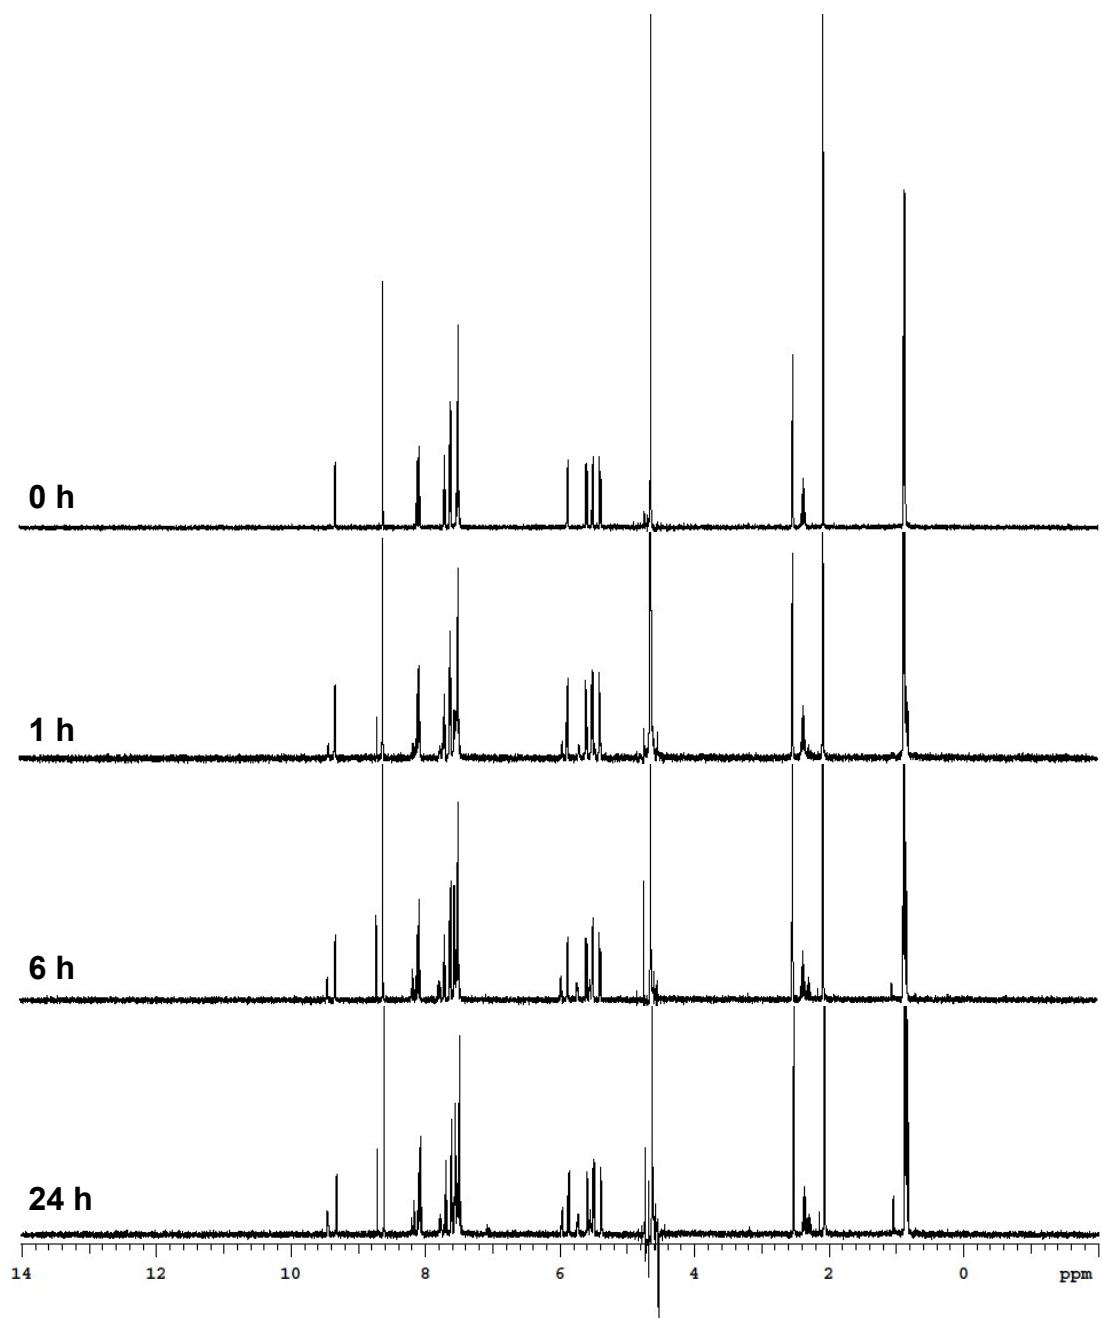

**Figure S13.** <sup>1</sup>H NMR of C1 in D<sub>2</sub>O and 10% D<sub>6</sub>-DMSO over prolonged periods of incubation at 37°C.

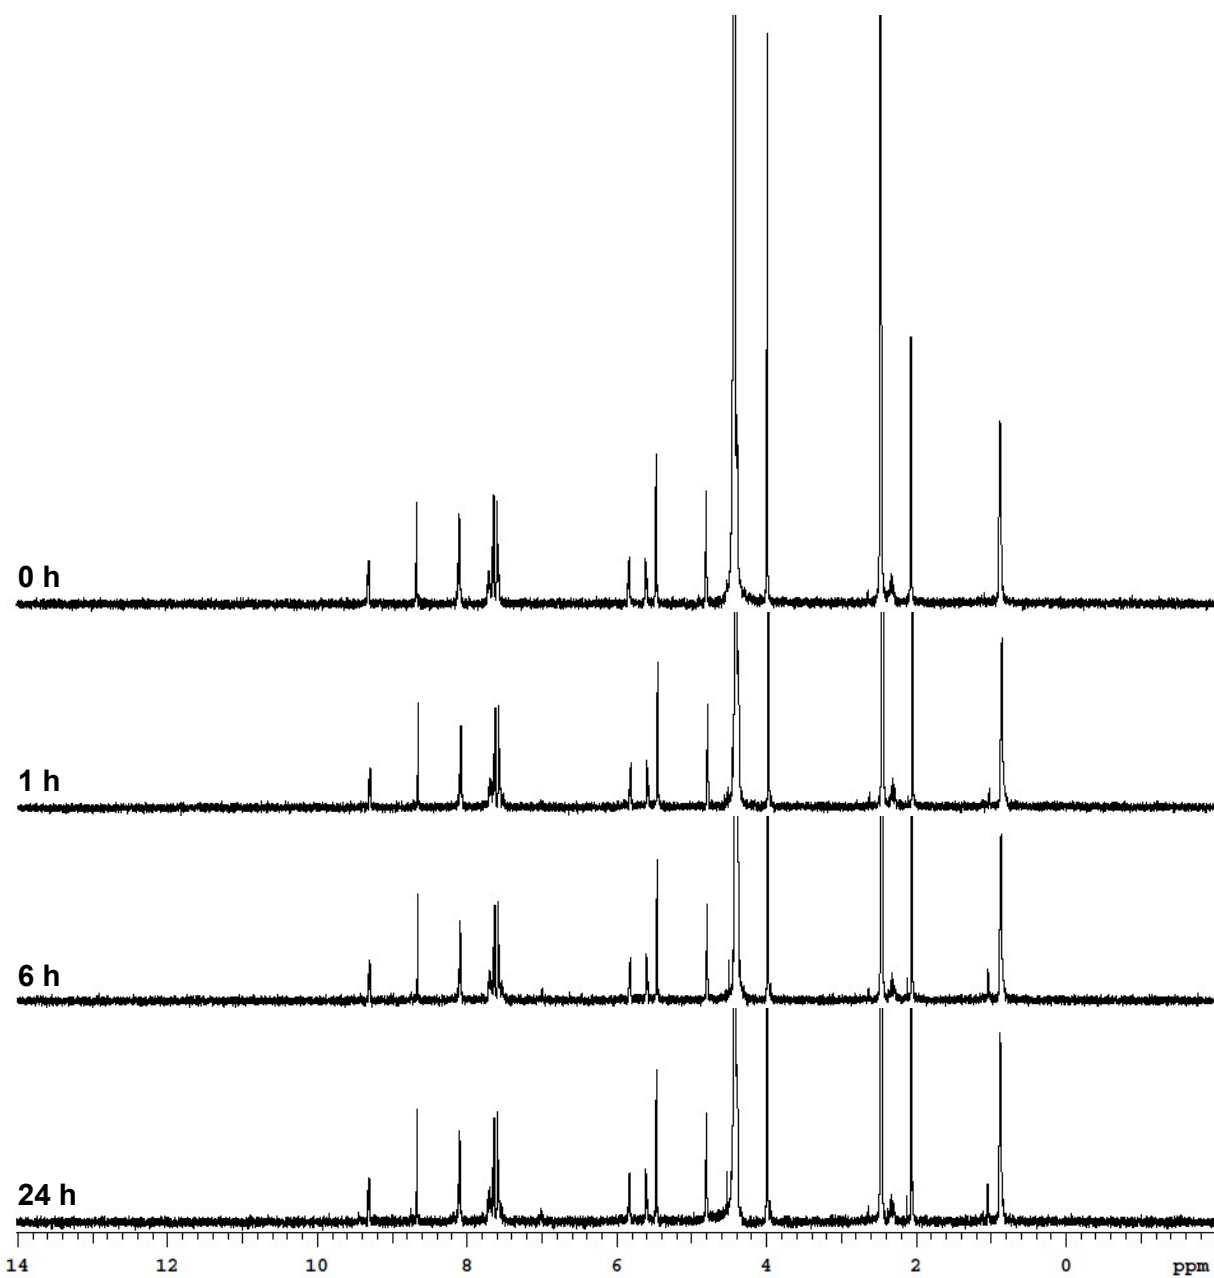

**Figure S14.** <sup>1</sup>H NMR of C2 in D<sub>2</sub>O and 50% D<sub>6</sub>-DMSO over prolonged periods of incubation at 37°C.

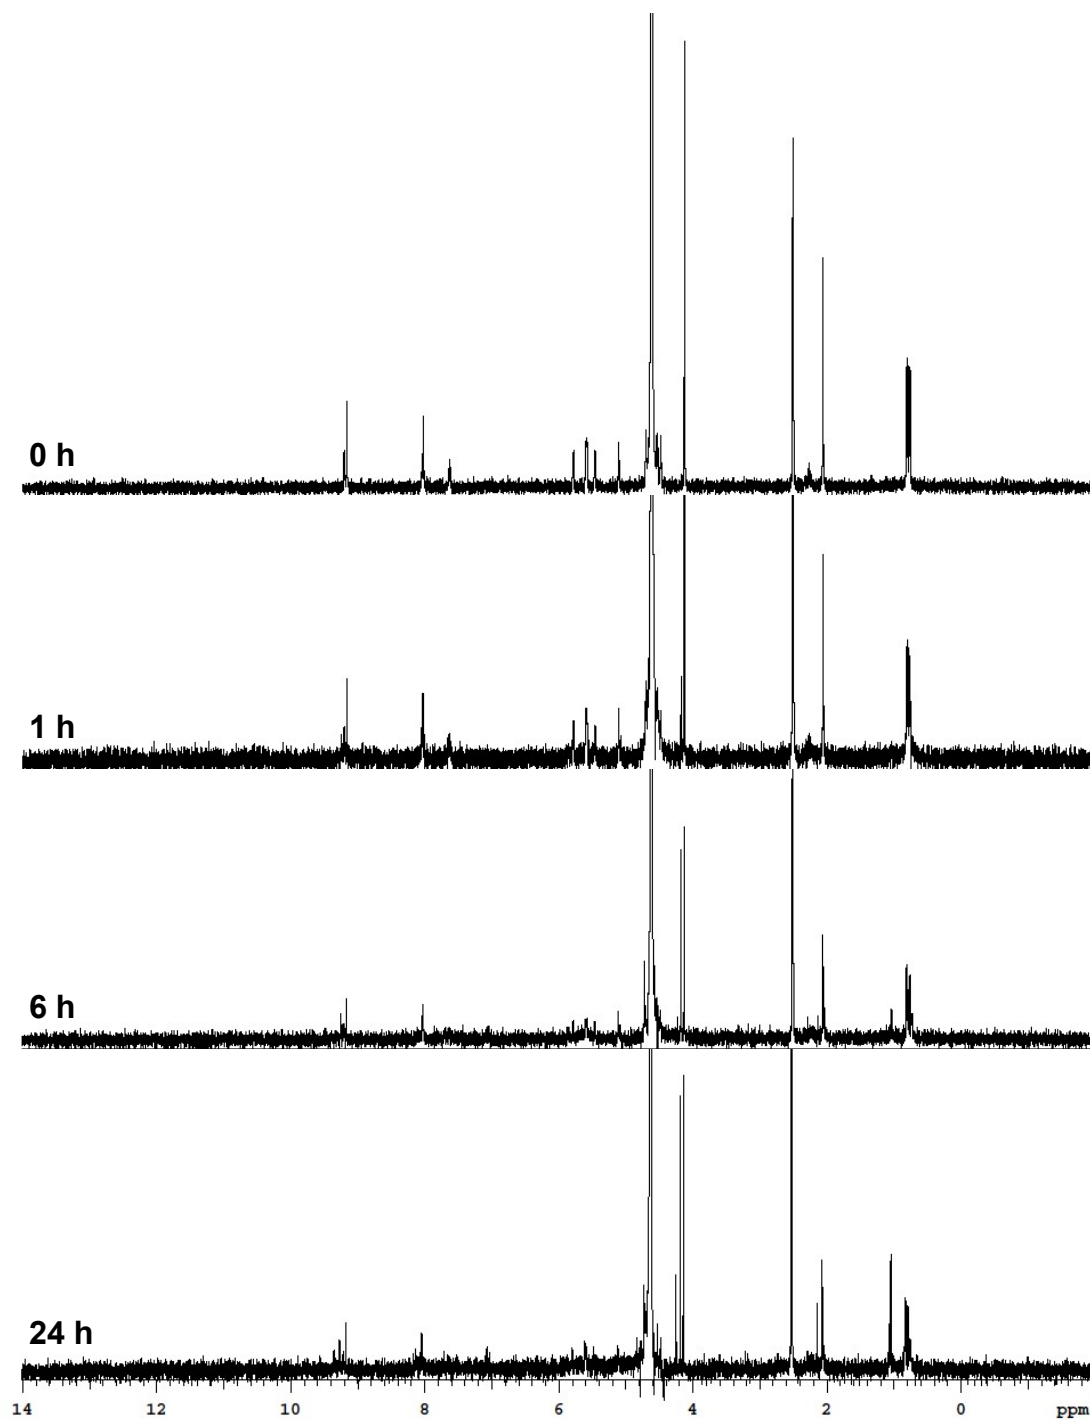

**Figure S15.**  $^1\text{H}$  NMR of **C3** in  $\text{D}_2\text{O}$  and 10%  $\text{D}_6$ -DMSO over prolonged periods of incubation at  $37^\circ\text{C}$ .

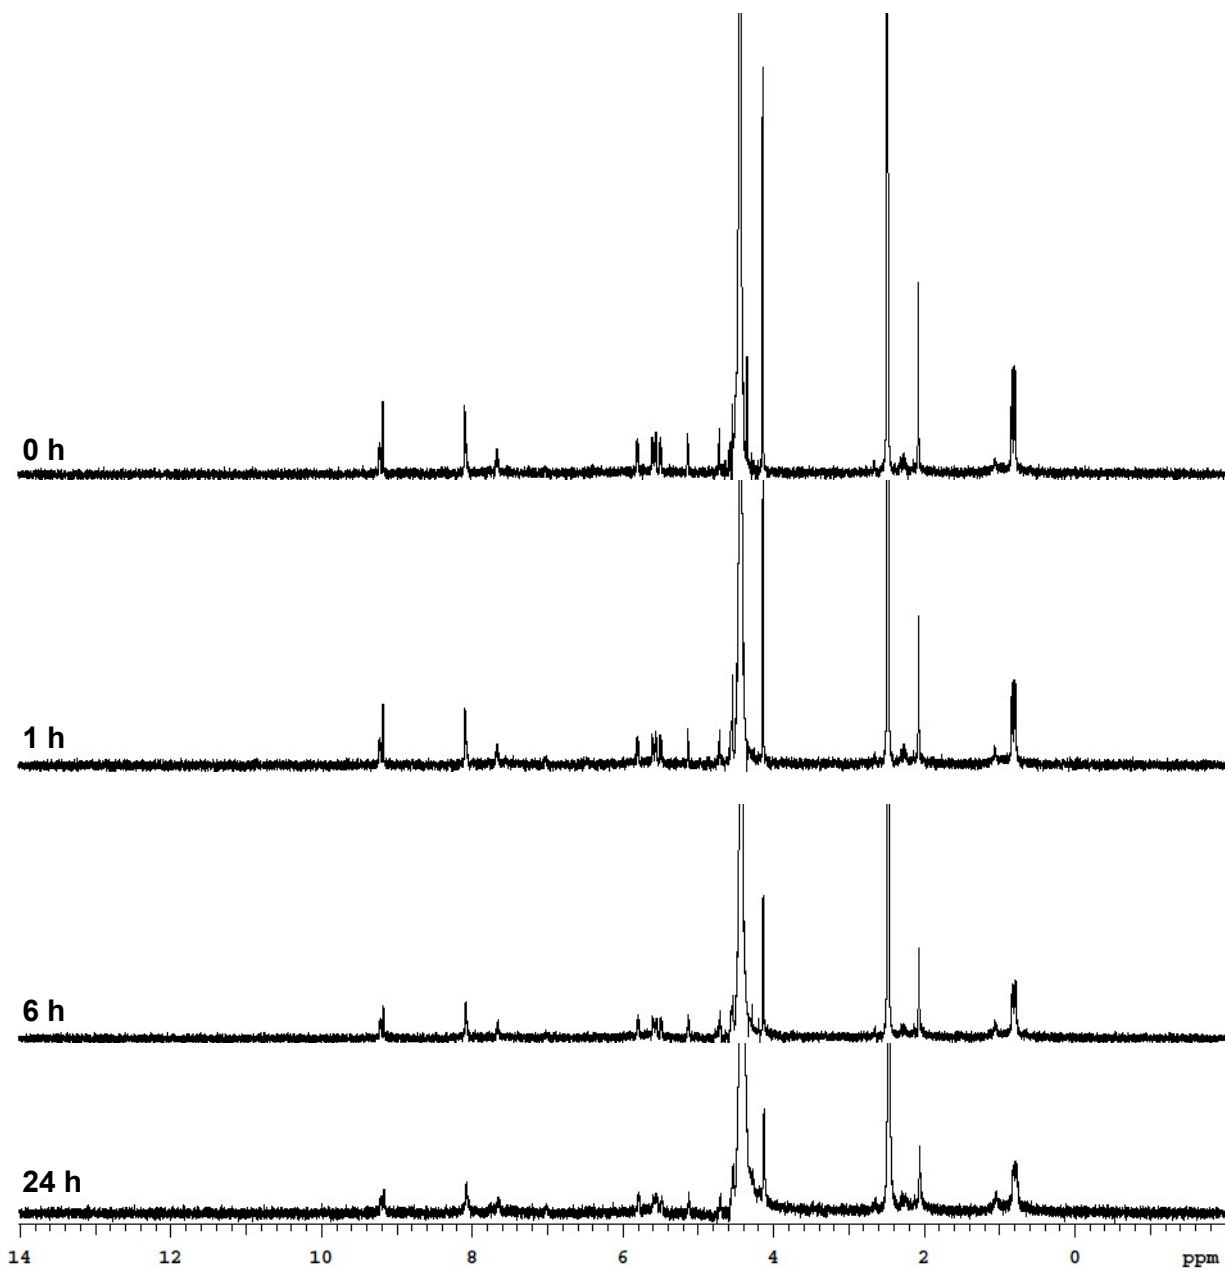

**Figure S16.**  $^1\text{H}$  NMR of **C3** in  $\text{D}_2\text{O}$  and 50%  $\text{D}_6$ -DMSO over prolonged periods of incubation at 37°C.

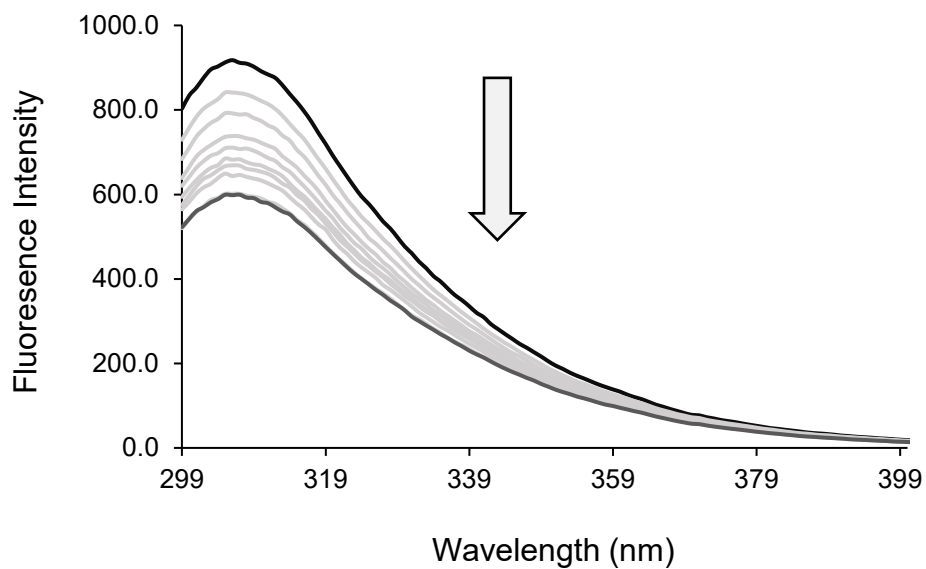

**Figure S17.** Fluorescence emission spectra at various complex-to-HSA ratios by the titration of HSA with **C1** using  $\lambda_{\text{ex}} = 260 \text{ nm}$  where the  $[\text{HSA}] = 10 \mu\text{M}$  and the  $[\text{Ru}] = 0\text{-}25 \mu\text{M}$ .

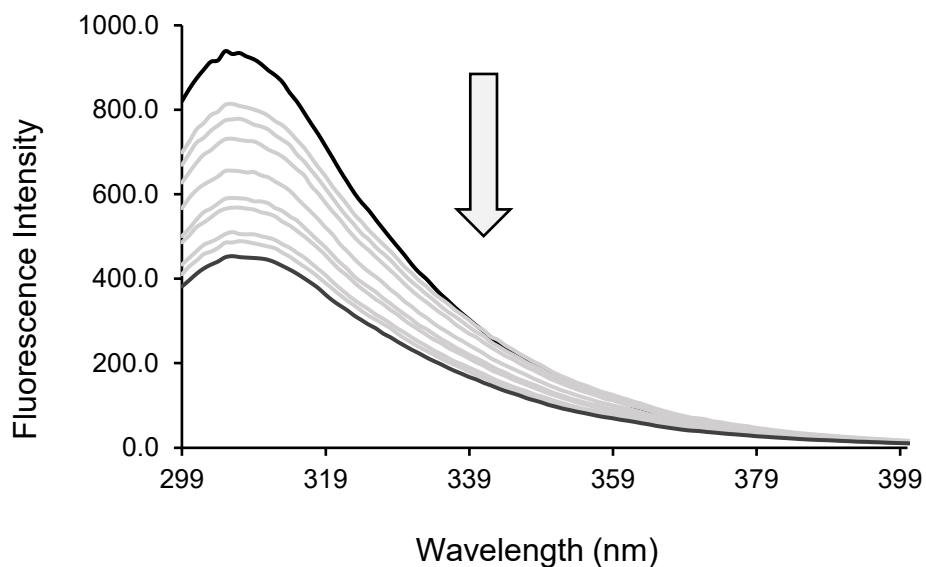

**Figure S18.** Fluorescence emission spectra at various complex-to-HSA ratios by the titration of HSA with **C2** using  $\lambda_{\text{ex}} = 260 \text{ nm}$  where the  $[\text{HSA}] = 10 \mu\text{M}$  and the  $[\text{Ru}] = 0\text{-}25 \mu\text{M}$ .

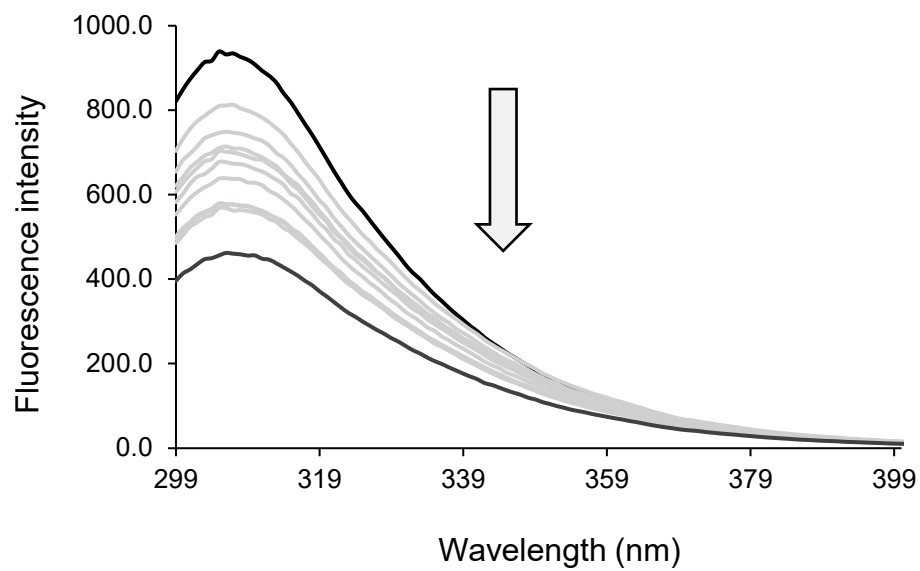

**Figure S19.** Fluorescence emission spectra at various complex-to-HSA ratios by the titration of HSA with **C3** using  $\lambda_{\text{ex}} = 260 \text{ nm}$  where the  $[\text{HSA}] = 10 \mu\text{M}$  and the  $[\text{Ru}] = 0\text{-}25 \mu\text{M}$ .



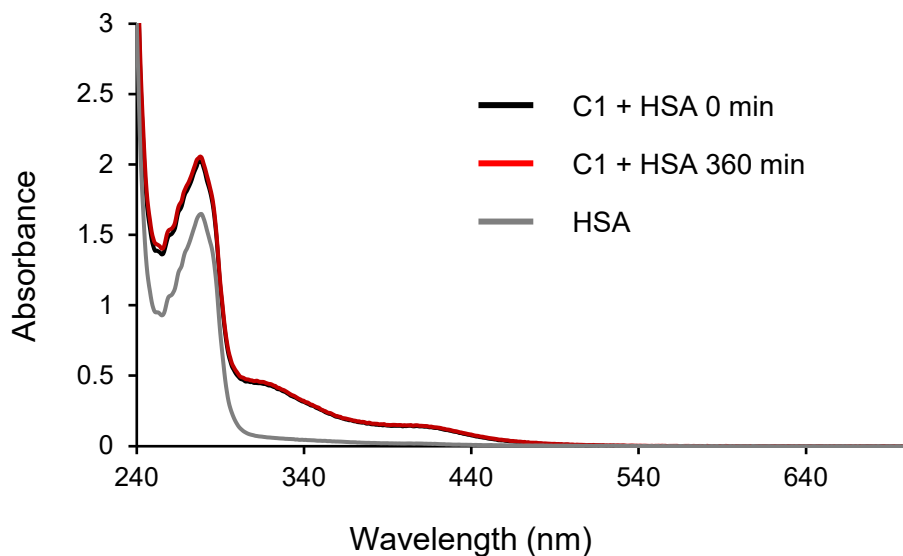

**Figure S20.** UV-Vis spectra of complex **C1** (50  $\mu$ M) incubated with HSA (50  $\mu$ M) in PBS buffer (pH 7.4) for 6 hours at 37  $^{\circ}$ C.

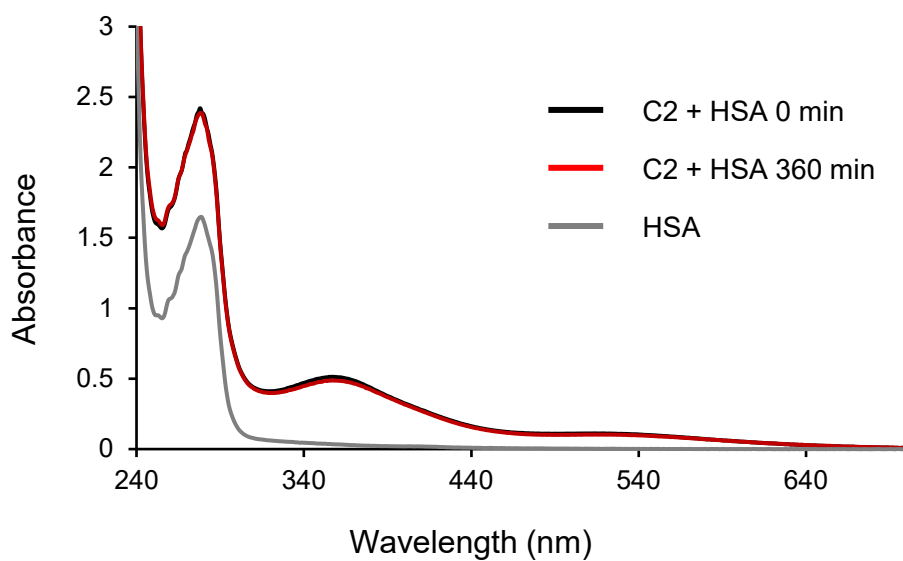

**Figure S21.** UV-Vis spectra of complex **C2** (50  $\mu$ M) incubated with HSA (50  $\mu$ M) in PBS buffer (pH 7.4) for 6 hours at 37  $^{\circ}$ C.

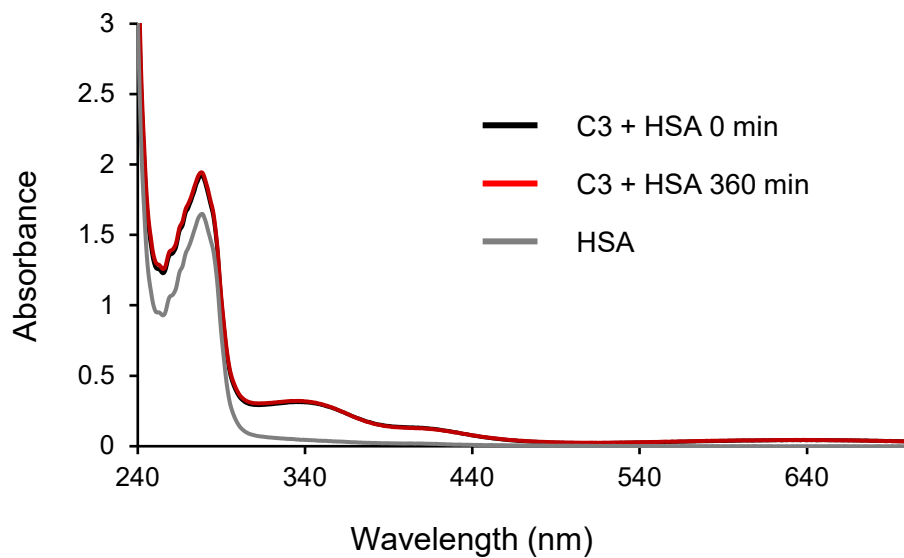

**Figure S22.** UV-Vis spectra of complex **C3** (50 μM) incubated with HSA (50 μM) in PBS buffer (pH 7.4) for 6 hours at 37 °C.

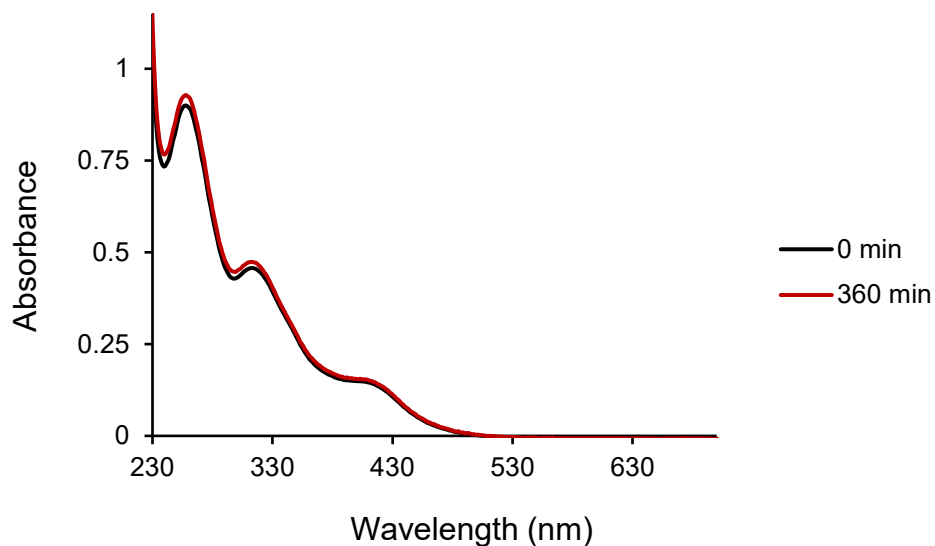

**Figure S23.** UV-Vis spectra of complex **C1** (50  $\mu\text{M}$ ) incubated with CT-DNA (50  $\mu\text{M}$ ) in Tris-HCl buffer (pH 7.0) for 6 hours at 37  $^{\circ}\text{C}$ .

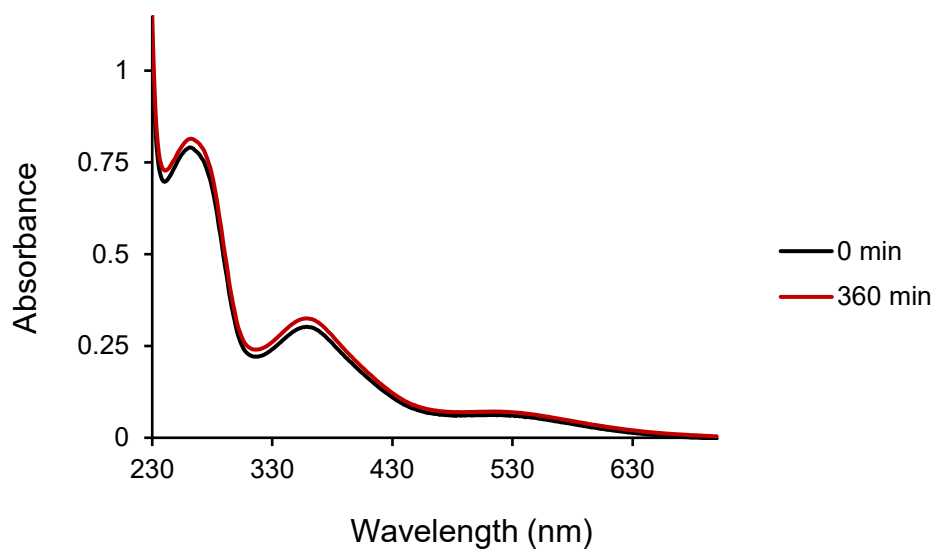

**Figure S24.** UV-Vis spectra of complex **C2** (50  $\mu\text{M}$ ) incubated with CT-DNA (50  $\mu\text{M}$ ) in Tris-HCl buffer (pH 7.0) for 6 hours at 37  $^{\circ}\text{C}$ .

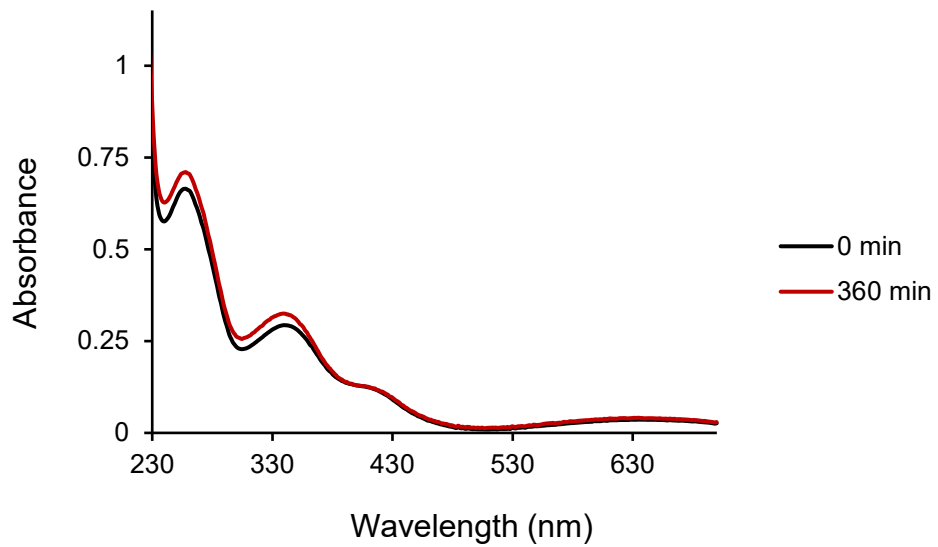

**Figure S25.** UV-Vis spectra of complex **C3** (50  $\mu\text{M}$ ) incubated with CT-DNA (50  $\mu\text{M}$ ) in Tris-HCl buffer (pH 7.0) for 6 hours at 37  $^{\circ}\text{C}$ .

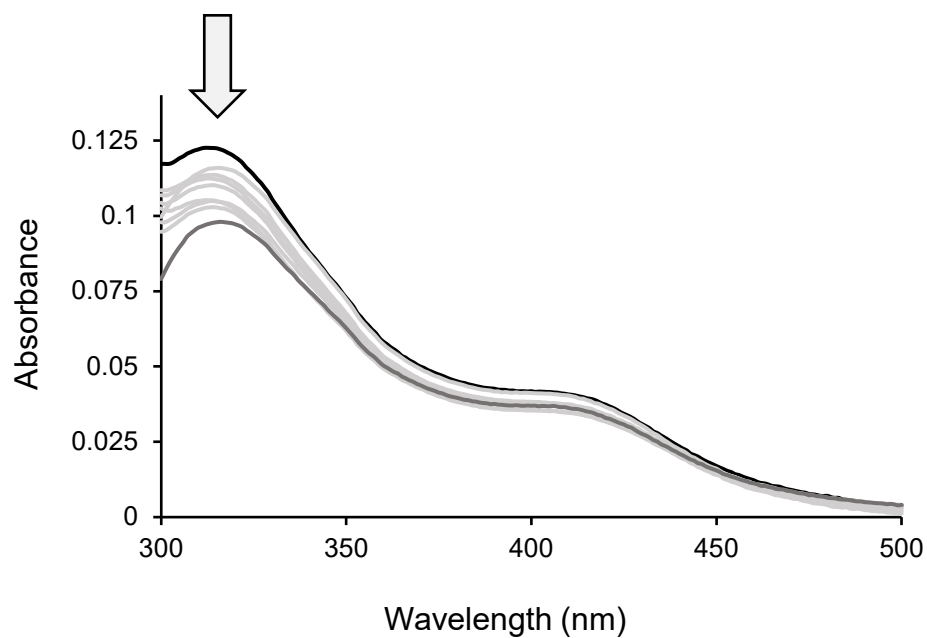

**Figure S26.** UV-Vis spectra of complex **C1** (30  $\mu\text{M}$ ) with CT-DNA (0 - 90  $\mu\text{M}$ ) in Tris-HCl buffer (pH 7.0) after 1 hour of incubation at 37  $^{\circ}\text{C}$ .

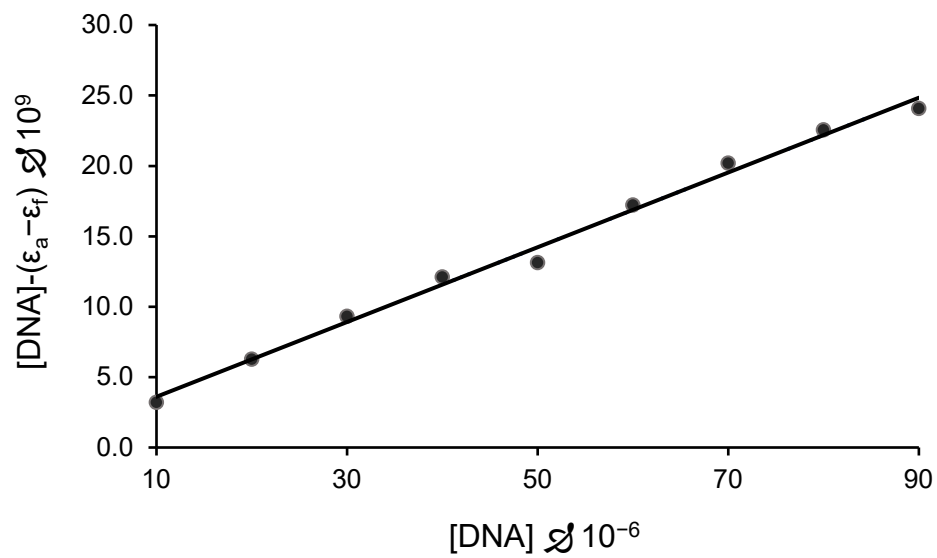

**Figure S27.** Plot of  $[\text{DNA}] / (\epsilon_A - \epsilon_F)$  versus  $[\text{DNA}]$  for the titration of **C1** with CT-DNA.

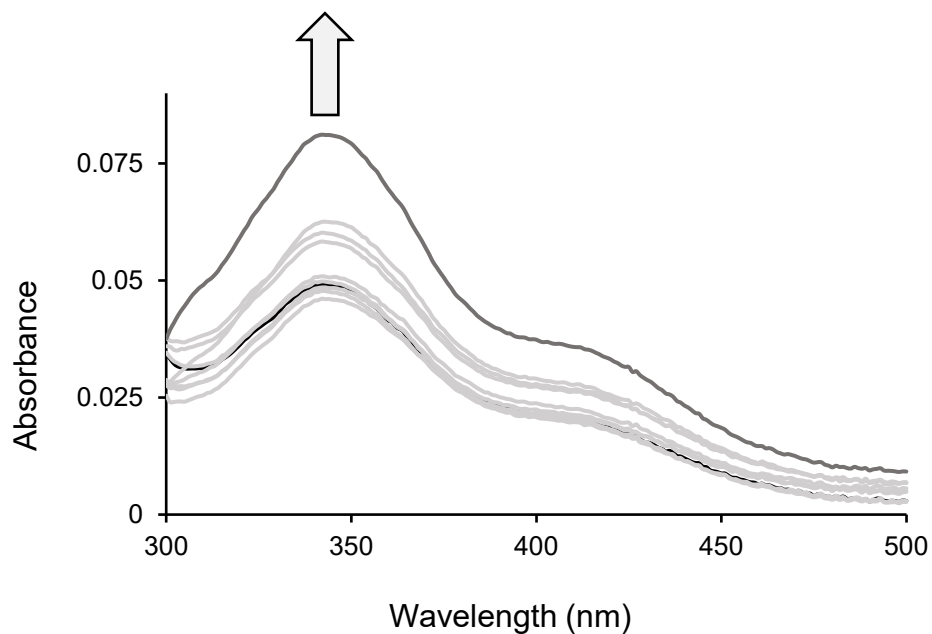

**Figure S28.** UV-Vis spectra of complex **C3** (30 μM) with CT-DNA (0 - 90 μM) in Tris-HCl buffer (pH 7.0) after 1 hour of incubation at 37 °C.

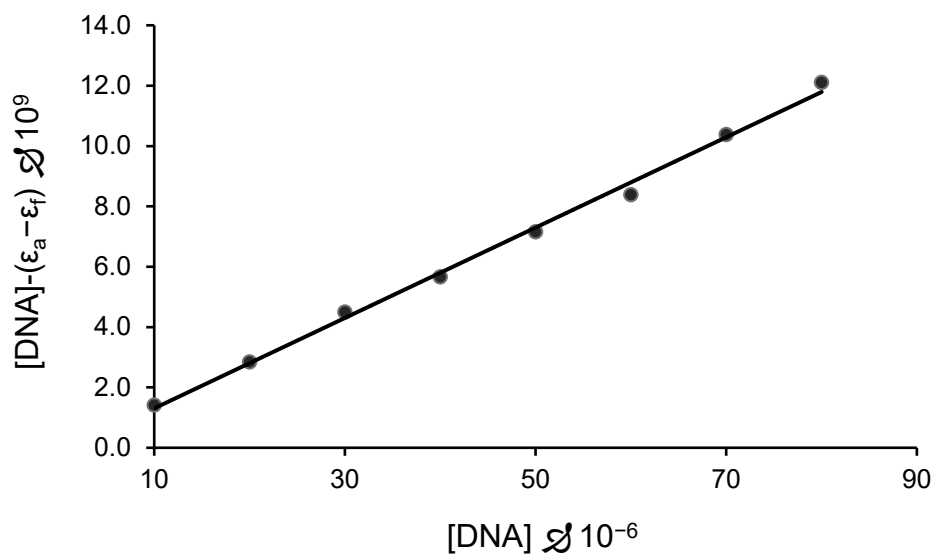

**Figure S29.** Plot of  $[DNA] / (\epsilon_A - \epsilon_F)$  versus  $[DNA]$  for the titration of **C3** with CT-DNA.

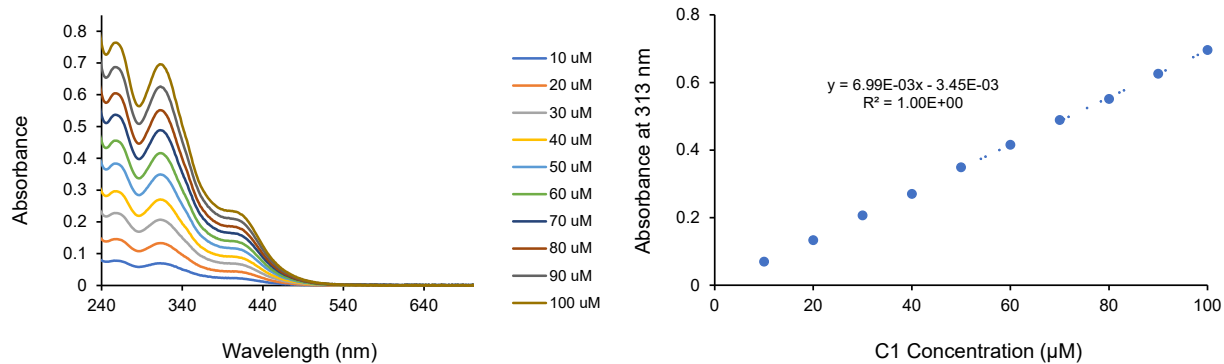

**Figure S30.** Calibration curve of **C1** in PBS (pH 7.4) to determine the extinction coefficient.

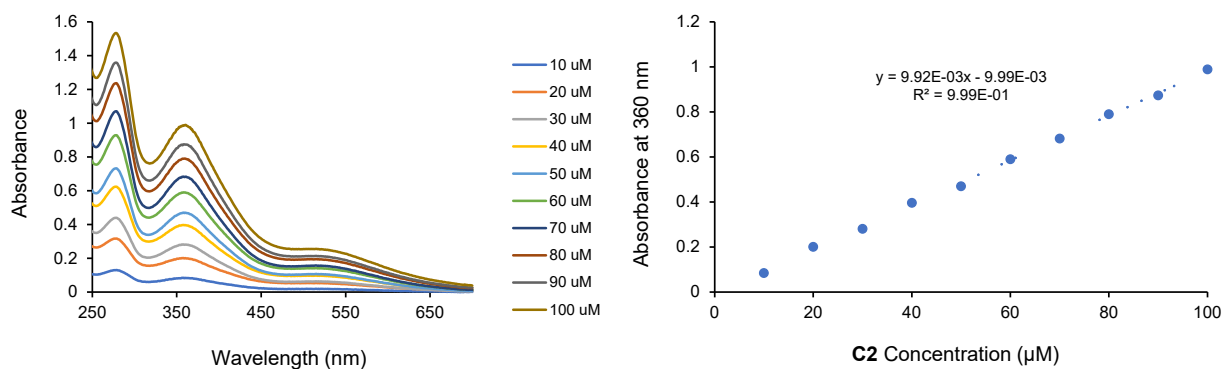

**Figure S31.** Calibration curve of **C2** in PBS (pH 7.4) to determine the extinction coefficient.

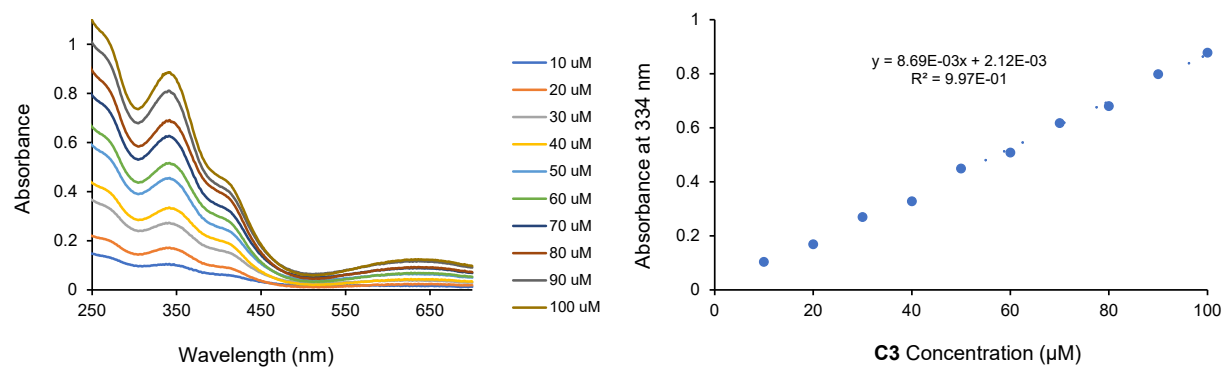

**Figure S32.** Calibration curve of **C3** in PBS (pH 7.4) to determine the extinction coefficient.

**Table S1.** Crystallographic data for complexes **C1** and **C3**.

|                                                                                                       | <b>C1</b>                                                                                           | <b>C3</b>                                                             |
|-------------------------------------------------------------------------------------------------------|-----------------------------------------------------------------------------------------------------|-----------------------------------------------------------------------|
| CCDC Number                                                                                           | 2192092                                                                                             | 2013493                                                               |
| molecular formula                                                                                     | C <sub>22</sub> H <sub>24</sub> ClF <sub>6</sub> N <sub>2</sub> PRu·C <sub>3</sub> H <sub>6</sub> O | C <sub>26</sub> H <sub>28</sub> ClF <sub>6</sub> FeN <sub>2</sub> PRu |
| fw                                                                                                    | 656.00                                                                                              | 705.84                                                                |
| crystal size (mm)                                                                                     | 0.36 × 0.12 × 0.05                                                                                  | 0.37 × 0.34 × 0.32                                                    |
| temp (K)                                                                                              | 100(2)                                                                                              | 100(2)                                                                |
| Crystal system                                                                                        | Triclinic                                                                                           | Monoclinic                                                            |
| space group                                                                                           | P1bar                                                                                               | P2 <sub>1</sub> /c                                                    |
| <i>a</i> (Å)                                                                                          | 9.1814(8)                                                                                           | 18.600(2)                                                             |
| <i>b</i> (Å)                                                                                          | 12.3291(11)                                                                                         | 20.872(2)                                                             |
| <i>c</i> (Å)                                                                                          | 12.6542(12)                                                                                         | 13.7091(12)                                                           |
| $\alpha$ (°)                                                                                          | 76.919(5)                                                                                           | 90                                                                    |
| $\beta$ (°)                                                                                           | 73.108(5)                                                                                           | 88.123(7)                                                             |
| $\gamma$ (°)                                                                                          | 87.998(5)                                                                                           | 90                                                                    |
| <i>V</i> (Å <sup>3</sup> )                                                                            | 1334.3(2)                                                                                           | 5319.3(10)                                                            |
| <i>Z</i>                                                                                              | 2                                                                                                   | 8                                                                     |
| Wavelength (Å)                                                                                        | 0.71073                                                                                             | 0.71073                                                               |
| $\rho_{\text{calcd}}$ (g/cm <sup>3</sup> )                                                            | 1.633                                                                                               | 1.763                                                                 |
| $\mu$ (mm <sup>-1</sup> )                                                                             | 0.812                                                                                               | 1.336                                                                 |
| $\theta$ range                                                                                        | 1.70 – 27.73                                                                                        | 1.10 – 32.12                                                          |
| refl. collected                                                                                       | 43026                                                                                               | 18735                                                                 |
| indep. refl. / <i>R</i> <sub>int</sub>                                                                | 6226 / 0.030                                                                                        | 18735 / 0.031                                                         |
| data/restraints/ parameters                                                                           | 43026 / 6226 / 0                                                                                    | 18735 / 804 / 295                                                     |
| <i>R</i> indices [ <i>I</i> > 2 $\sigma$ ( <i>I</i> ); <i>R</i> <sub>1</sub> / <i>wR</i> <sub>2</sub> | 0.0199 / 0.0466                                                                                     | 0.0306 / 0.0773                                                       |
| <i>R</i> indices all data; <i>R</i> <sub>1</sub> / <i>wR</i> <sub>2</sub>                             | 0.0234 / 0.0482                                                                                     | 0.0417 / 0.0844                                                       |
| largest peak/hole<br>(eÅ <sup>-3</sup> )                                                              | 0.703 / -0.409                                                                                      | 0.977 / -0.678                                                        |
| GOF                                                                                                   | 1.035                                                                                               | 1.079                                                                 |
